# Supplementary material for: Prespecified dose-response analysis for A Very Early Rehabilitation Trial (AVERT)
Source: PubMed Central journal article supplement — Neurology. 2016 Jun 7;86(23):2138–45. doi: 10.1212/WNL.0000000000002459 (PMC4898313; doi:10.1212/wnl.0000000000002459), 2016-06-07
Supplement: supp_WNL.0000000000002459_Table_e-1.pdf [file supp_WNL.0000000000002459_Table_e-1.pdf]

**Table e-1**

Regression analysis for usual care group only, showing that increased out of bed session frequency, and reduced time to first mobilisation significantly improve the odds of a favourable outcome. For every 5 minute reduction in total amount spent in out of bed activity significantly increases the odds of a favourable outcome (Model 2).

These findings are consistent with those reported for the whole group (see table 3, main paper) and confirm the importance of frequency on achieving a favourable outcome.

|                                                                                       | <b>Favourable outcome<br/>OR (95%CI)</b> | <b>p value</b> |
|---------------------------------------------------------------------------------------|------------------------------------------|----------------|
| <b>Model 1</b>                                                                        |                                          |                |
| Time to first mobilisation<br>(per extra hour)                                        | 0.98 (0.97–0.99)                         | 0.002          |
| Frequency, median daily sessions**<br>(per one extra session)                         | 1.12 (1.04–1.21)                         | 0.004          |
| Daily amount, median<br>(per extra 5 minutes minutes)                                 | 1.00 (0.93–1.07)                         | 0.942          |
| <b>Model 2</b>                                                                        |                                          |                |
| Time to first mobilisation<br>(per extra hour)                                        | 0.98 (0.97–0.99)                         | 0.002          |
| Frequency, median daily sessions<br>(per one extra session)                           | 1.15 (1.06–1.23)                         | 0.0001         |
| Total amount <sup>#</sup><br>(per extra 5 minute minutes over<br>intervention period) | 0.98 (0.98–0.99)                         | 0.001          |

Favourable outcome=mRS score 0–2. All analyses are adjusted for age and baseline stroke severity (NIHSS).

Model 1 examines the effect of time to first mobilisation, median daily session frequency and an extra 5 minutes per day on a favourable outcome.

Model 2 examines the effect of an extra 5 minutes over the intervention period (<14 or discharge, whichever is sooner) on the odds of a favourable outcome.

\*\*Frequency is derived from nursing and physiotherapist data.

# Amount (minutes) is derived from physiotherapist data only.
